# Supplementary material for: Coordination of substitutionally inert phenolate ligands to lanthanide(ii) and (iii) compounds—catalysts for ring-opening polymerization of cyclic esters
Source: Royal Society of Chemistry journal article supplement (doi:10.1039/b821770j), 2009-01-01
Supplement: b821770j.pdf [file b821770j.pdf]

### Supplementary Information

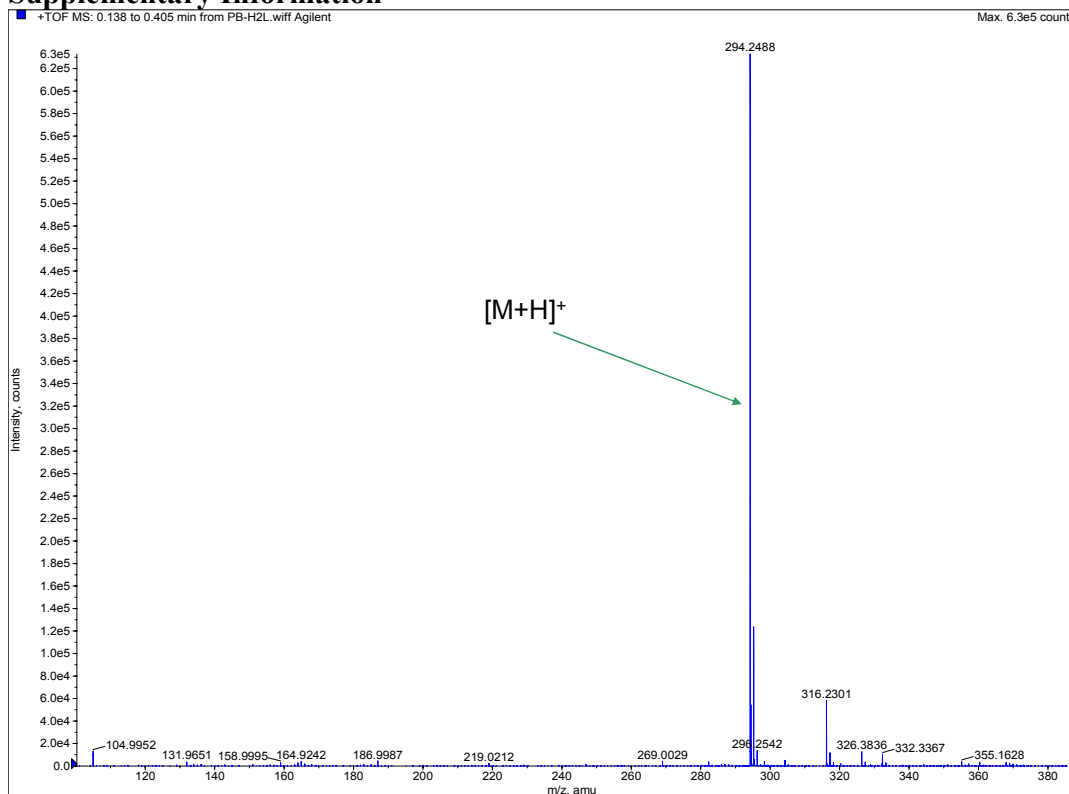

**Figure S1:** ESI- Mass spectrum of ligand H<sub>2</sub>L<sup>I</sup> indicating the molecular ion peak ([M+H]<sup>+</sup>)

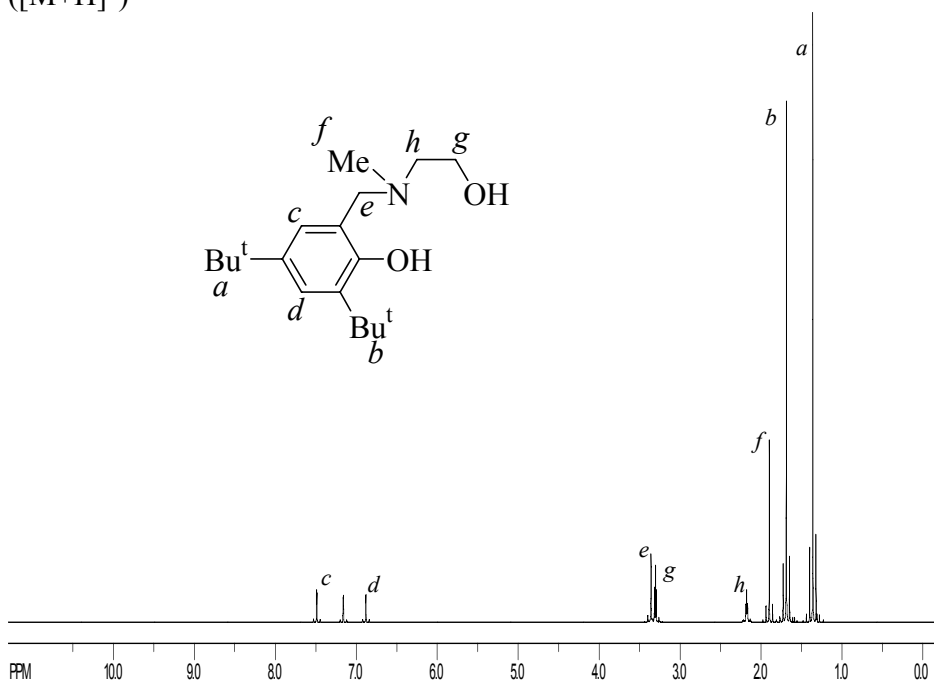

**Figure S2:** <sup>1</sup>H NMR spectrum of ligand H<sub>2</sub>L<sup>I</sup> in C<sub>6</sub>D<sub>6</sub> at 25 °C

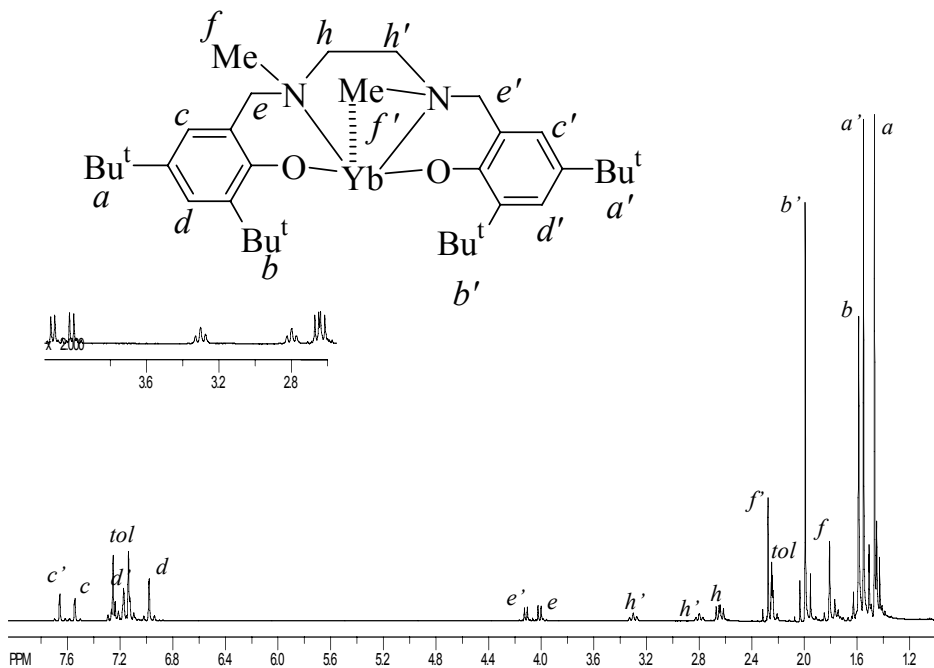

**Figure S3:**  $^1\text{H}$  NMR spectrum of  $[\text{Yb}(\text{L}^{\text{II}})]_2$  (**2**) in  $\text{C}_7\text{D}_8$  at  $25^\circ\text{C}$

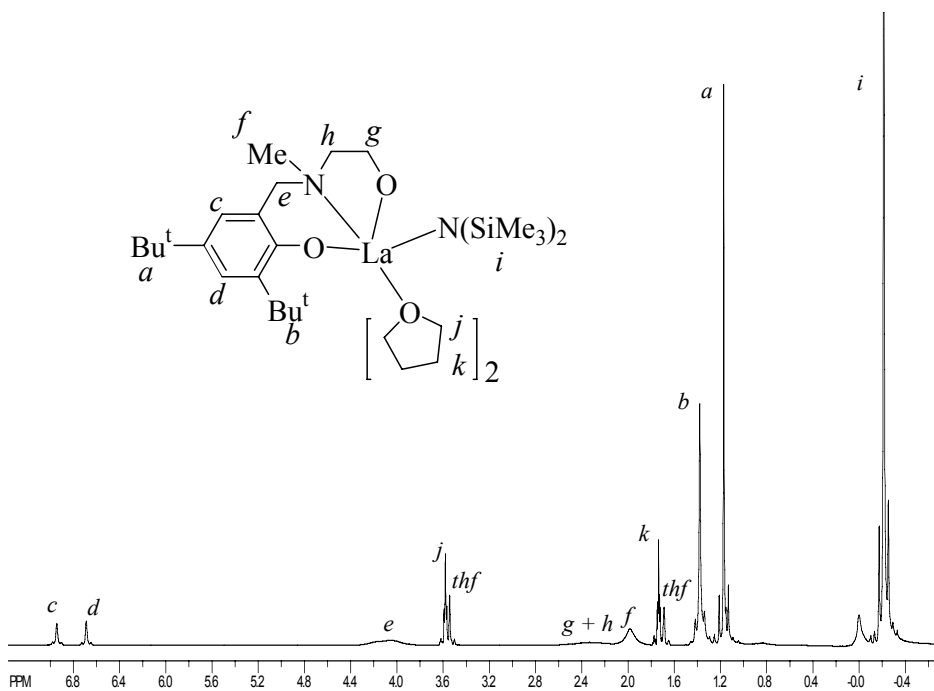

**Figure S4:**  $^1\text{H}$  NMR spectrum of  $[\text{La}(\text{L}^{\text{I}})(\text{N}(\text{SiMe}_3)_2)(\text{THF})_2]$  (**6**) in  $\text{C}_4\text{D}_8\text{O}$  at  $25^\circ\text{C}$

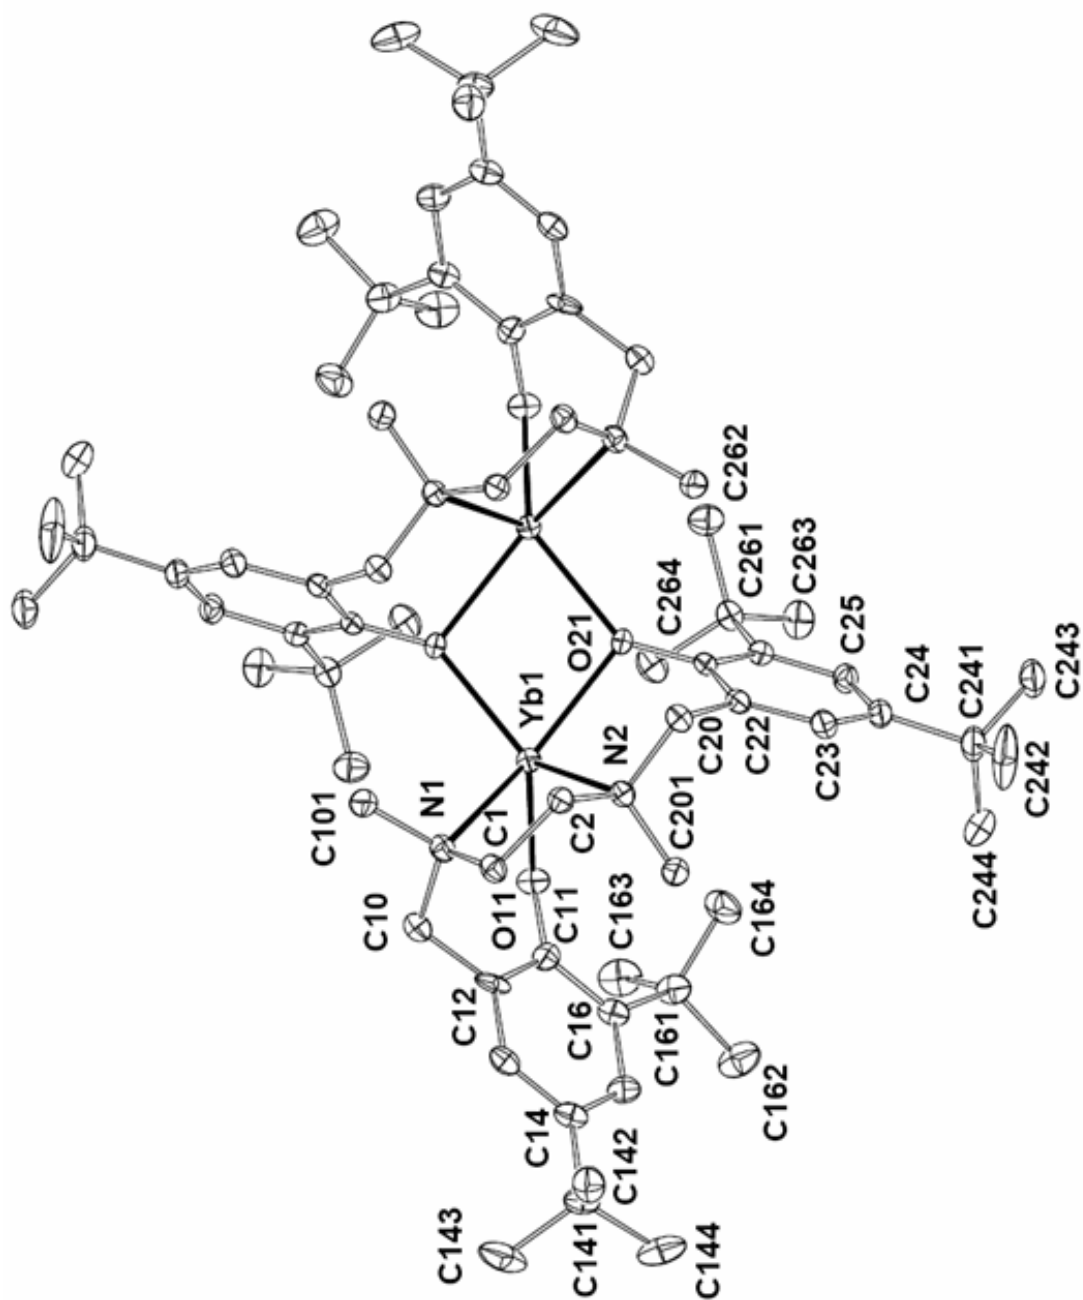

**Figure S5:** ORTEP diagram of compound 2 with hydrogen atoms omitted for clarity. Thermal ellipsoids are drawn at the 50% probability level.

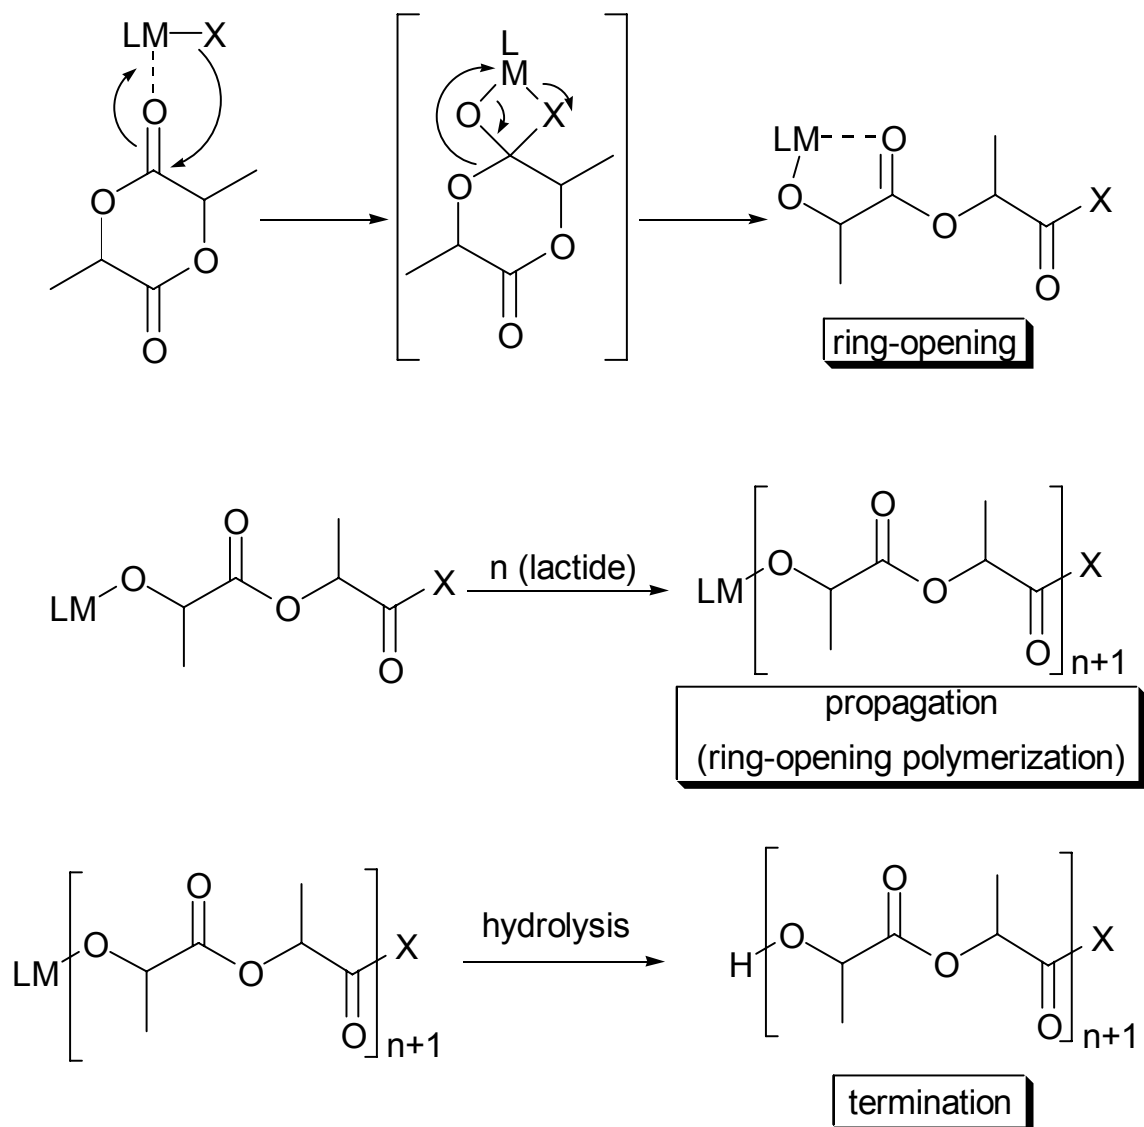

**Figure S6:** Commonly accepted coordination–Insertion Mechanism for ring-opening polymerization of lactide catalyzed by LMX. A similar mechanism is invoked for  $\epsilon$ -caprolactone.

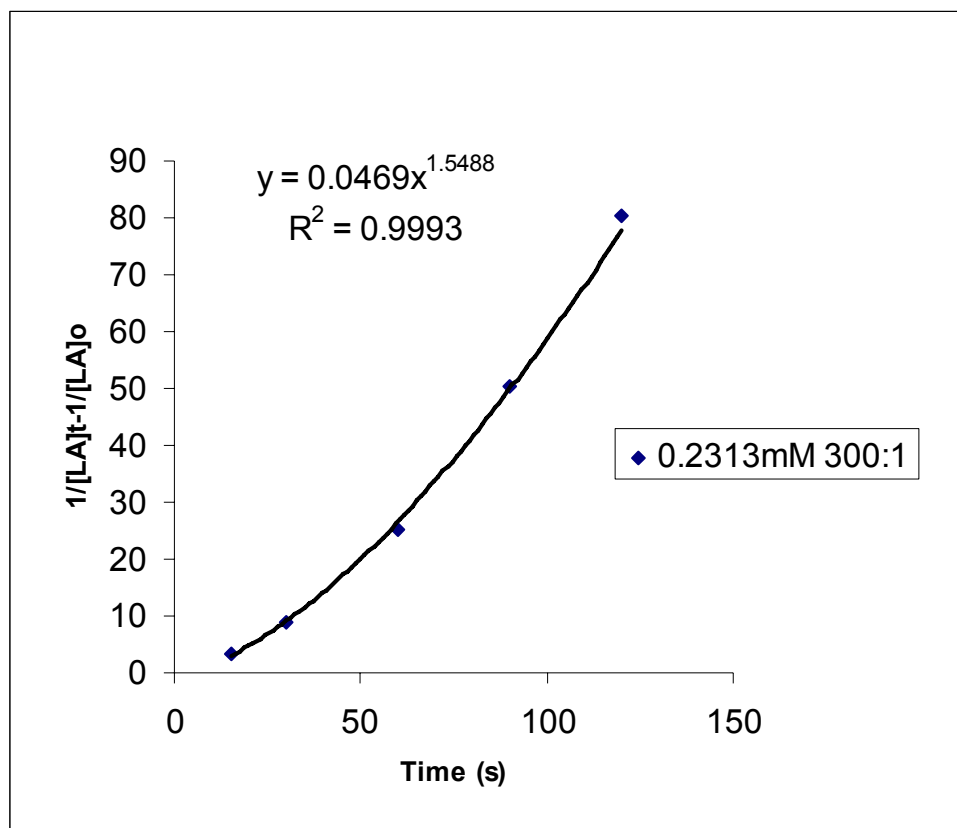

**Figure S7:** Second-order kinetic plots for *L*-lactide vs. time using compound **6** as an initiator at 0.2313 mM (300:1)
